# Bet hedging is not sufficient to explain intraspecific variation in germination patterns of a winter annual plant

Gregor-Fausto Siegmund<sup>1,\*</sup>

David A. Moeller<sup>2</sup>,

Vincent M. Eckhart<sup>3</sup>,

Monica A. Geber<sup>1</sup>

1. Department of Ecology and Evolutionary Biology, Cornell University, Ithaca, New York 14853;
2. Department of Plant and Microbial Biology, University of Minnesota, St. Paul, Minnesota 55108;
3. Department of Biology, Grinnell College, Grinnell, Iowa 50112

\* Corresponding author; e-mail: [gs589@cornell.edu](mailto:gs589@cornell.edu).

*Manuscript elements:* Figure 1, figure 2, figure 3, figure 4, figure 5, table 1, table 2, table 3, online supplement A (including figures S1-10 and tables S1-11).

*Keywords:* Bet hedging, delayed germination, seed banks, life-history evolution.

*Manuscript type:* Article.

*Code:* R code associated with the manuscript is available on Zenodo.

Link to Zenodo repository: <https://doi.org/10.5281/zenodo.7082021>

## Abstract

Bet hedging consists of life history strategies that buffer against environmental variability by trading off immediate and long-term fitness. Delayed germination in annual plants is a classic example of bet hedging, and is often invoked to explain low germination fractions. We examined whether bet hedging explains low and variable germination fractions among 20 populations of the winter annual plant *Clarkia xantiana* ssp. *xantiana* that experience substantial variation in reproductive success among years. Leveraging 15 years of demographic monitoring and 3 years of field germination experiments, we assessed the fitness consequences of seed banks and compared optimal germination fractions from a density-independent bet-hedging model to observed germination fractions. We did not find consistent evidence of bet hedging or the expected trade-off between arithmetic and geometric mean fitness, though delayed germination increased long-term fitness in 7 of 20 populations. Optimal germination fractions were 2 to 5 times higher than observed germination fractions, and among-population variation in germination fractions were not correlated with risks across the life cycle. Our comprehensive test suggests that bet hedging is insufficient to explain the observed germination patterns. Understanding variation in germination strategies will likely require integrating bet hedging with complementary forces shaping the evolution of delayed germination.

18

## Introduction

Organisms across the tree of life exhibit life-history strategies that allow persistence in the face of environmental uncertainty. For annual plants, interannual variation in reproductive success  
21 driven by environmental variation can favor the evolution of delayed germination that establishes soil seed banks. Seed banks not only buffer plant populations against environmental change and stochasticity (Eager et al. 2014; Paniw et al. 2017), but also increase effective population  
24 size (Nunney 2002; Waples 2006), and maintain genetic diversity (McCue and Holtsford 1998). Theory thus suggests that seed banks have key ecological and evolutionary consequences (Evans and Dennehy 2005).

27 Evolutionary ecologists have long interpreted delayed germination, caused by persistent or variable seed dormancy, as a bet hedging strategy (Bulmer 1984; Cohen 1966; Ellner 1985*a,b*; Philippi and Seger 1989; Simons 2011). Bet hedging increases geometric mean fitness by reducing  
30 variability in reproductive success, even if it decreases the arithmetic mean fitness (Seger and Brockman 1987). At the level of individuals, this trade-off between fitness mean and variance is the product of a single genotype that expresses phenotypic variance (Philippi and Seger 1989;  
33 Seger and Brockman 1987). For example, a genotype that produces seeds with varying levels of dormancy may have lower fitness in years when all seedlings successfully set seed because only a fraction of the bet hedging genotype's seeds contribute to next year's population. However,  
36 geometric mean fitness is multiplicative and thus sensitive to variability in reproductive success between years. A seed bank prevents the bet hedging genotype's extinction if there is any chance of complete reproductive failure. Genotypes without delayed germination would be lost. The  
39 value of delayed germination also depends on how safe the seed bank is; if seed mortality is high, there is a greater risk to remaining in the soil (Cohen 1966). Ultimately, the individual-level advantage of bet hedging translates to the population-level by increasing long-term population  
42 growth rates and persistence.

Some empirical studies suggest that delayed germination, relative to a strategy with com-

plete germination, meets the criteria for bet hedging (Clauss 1999; Evans et al. 2007; Gremer  
45 and Venable 2014; Kalisz and McPeck 1993). Specifically, these studies identify the following  
population-level patterns: (1) reduced arithmetic mean fitness but (2) lower variance in fitness  
(Clauss 1999), (3) higher long-term stochastic population growth rate (Kalisz and McPeck 1993),  
48 or all three at once (Evans et al. 2007; Gremer and Venable 2014). Some degree of delayed ger-  
mination should be favored when there is a nonzero probability of complete reproductive failure  
(Cohen 1966). Species exhibit substantial intraspecific variation in germination fractions (e.g.,  
51 Fernández-Pascual et al. 2013; Gremer et al. 2020; Torres-Martínez et al. 2017), and determining  
the fitness consequences of this variation remains an open area of inquiry.

If delayed germination functions as a bet hedging strategy that maximizes geometric mean  
54 fitness, the optimal germination fraction in a population is expected to have evolved in response  
to that population's seed mortality and temporal variability in reproductive success (Cohen 1966;  
Franch-Gras et al. 2017; Pinceel et al. 2021). A strong test of whether germination fractions are  
57 optimally adaptive would be to compare observed and optimal germination fractions, taking  
into account the complete life-history (Childs et al. 2010; Simons 2011). For example, interspe-  
cific comparisons of a winter annual plant community in the Sonoran Desert demonstrated the  
60 adaptive value of delayed germination; lower germination fractions were accurately predicted  
for species whose seeds experienced low mortality and whose seedlings had high variability in  
reproductive success (Gremer and Venable 2014). However, we are not aware of studies focused  
63 on whether intraspecific (among-population) differences in delayed germination reflect variation  
in the fitness consequences of germination. Such a test would provide evidence that delayed  
germination functions as bet hedging and determine the extent to which observed germination  
66 fractions maximize fitness (categories V and IV in Simons 2011).

Populations of the winter annual, *Clarkia xantiana* ssp. *xantiana*, in the southern Sierra Nevada  
are distributed across a complex landscape of varying elevation, slope, aspect, precipitation, and  
69 temperature (Fig. 1A; Eckhart et al. 2011; Gould et al. 2014). Despite early work that suggested  
the species lacked a seed bank (Lewis 1962), multiple lines of evidence now support the presence

and relevance of a seed bank in populations of *C. xantiana* ssp. *xantiana*. In field experiments, seeds can germinate at least up to three years after being buried in bags (Eckhart et al. 2011) or pots (M. A. Geber, unpublished data). Fifteen years of surveys suggest that the seed bank allows some populations to persist exclusively as seeds for as long as 4 consecutive years (Fig. 1B). Seeds can also remain viable for up to 11 years when buried in bags 30 cm below the soil surface (D. A. Moeller, unpublished data). *Clarkia xantiana* ssp. *xantiana* seeds lack morphological adaptations for dispersal (Knies et al. 2004), and the species' small-scale spatial distribution is consistent with dispersal limitation (Kramer et al. 2011). We thus expect a limited role for dispersal to complement delayed germination under temporal variability (Venable and Brown 1988), and little seed dispersal among populations during this study.

A previous study of *C. xantiana* ssp. *xantiana* population dynamics identified a decrease in population growth rate from west to east across the species' distribution in the southern Sierra Nevada, CA (Eckhart et al. 2011). Germination rate of first-year seeds increased from west to east (Eckhart et al. 2011). Variability in rainfall during the growing season shows a similar pattern as germination, from less variable (and wetter) in the west to more variable (and drier) in the east (Eckhart et al. 2011). Demographic observations (Eckhart et al. 2011) and transplant experiments demonstrate that seed set can exhibit dramatic interannual variation associated with rainfall [e.g., 30-fold between a wet and dry year in Geber and Eckhart (2005)].

Here, we test whether observed germination fractions and life-history patterns in *Clarkia xantiana* ssp. *xantiana* are consistent with predictions made by bet hedging models. We combine 15 years of observations on reproductive success and 3 years of seed burial experiments from 20 populations to address the following questions. (1) Does delayed germination and the formation of a seed bank meet the criteria for bet hedging? Specifically, for each population, we test whether delayed germination decreases arithmetic mean fitness, reduces the variability in fitness, and increases the long-term stochastic population growth rate. Next, we tested whether the observed germination fractions are likely to be adaptive. (2) For each population, does the optimal germination fraction predicted by bet hedging models match observed germination fraction? We

find that life-history patterns are not entirely consistent with bet hedging expectations. We thus  
99 examine the relationship between germination fraction and risk, both by seeds before germina-  
tion and by seedlings after germination. Under bet hedging, we expect a negative correlation  
between germination fraction and risk, so we specifically ask the following questions: (3) Is there  
102 a negative correlation between germination fraction and seed survival across populations? (4) Is  
there a negative correlation between germination fraction and variability in per-capita reproduc-  
tive success across populations?



105

## Methods

### *Clarkia xantiana* ssp. *xantiana* life history

*Clarkia xantiana* ssp. *xantiana* is a winter annual that germinates with late fall and winter rains, and sets seeds during the summer drought, in California's Mediterranean climate. In our study region, the Kern River Canyon and Valley (Kern and Tulare Counties, California, U.S.A.), germination happens from November through March. Seedlings grow in winter and spring, and surviving plants flower in late spring and early summer, late April into mid-June. Pollinated fruits set seed in the early summer, June to July, and fruits subsequently dry out and gradually split open. Most seeds appear to be shed from fruits within 3-4 months after production, but can remain on the plant for more than a year. Seeds are small ( $< 1$  mm in width) and have no structures to aid in aerial or other dispersal.

We represent the *Clarkia xantiana* ssp. *xantiana* life-history in terms of transitions from October of year  $t$  to October of year  $t + 1$ . Transitions are the product of seed survival and germination, and aboveground seedling survival to fruiting, fruit production, and seeds per fruit. For this study, we assume that the new and old seeds differ in their survival rates in the seed bank, but do not include additional age structure and assume germination of new and old seeds is the same. We also assume that all plants experience the same vital rates upon germination. We describe population growth rate by the following equation:

$$\lambda = g_1 Y(t) s_0 s_1 + (1 - g_1) s_2 s_3. \quad (1)$$

Germination is given by  $g_1$ . Seed survival from seed production in June/July to the first October is  $s_0$ . Seed survival from the first October to germination in January/February is  $s_1$ . Survival of ungerminated seeds from January/February to the next October is  $s_2$ . Seed survival from October to the second germination opportunity the following January/February is  $s_3$ . Per-capita reproductive success in year  $t$ ,  $Y(t)$  is the product of seedling survival to fruiting, fruits per plant,



129 and seeds per fruit. All parameters are summarized in Table 1.

## Creating the dataset

We used field surveys and experiments to assemble observations of above- and below-ground  
132 demography for 20 populations of *Clarkia xantiana* ssp. *xantiana* across its range (Table 2, S1).  
A subset of the demographic data has been used to test hypotheses about geographic variation  
in population growth rate and species distributions (Eckhart et al. 2011; Pironon et al. 2018).  
135 Here, we used field surveys to collect data on seedling survival, fruit production, and seed set.  
We also conducted field experiments to observe emergence of seedlings and seeds remaining  
intact in the soil seed bank. We used the data from the surveys and experiments to estimate  
138 the demographic parameters that describe the life cycle (Equation 1). Ultimately, we used these  
estimates to calculate per-capita reproductive success, seed survival, and germination to test  
predictions of bet hedging models.

### 141 *Field surveys for aboveground components of demography*

We conducted field surveys of seedlings, fruiting plants, fruits per plant, and seeds per fruit  
at two spatial scales (Figure 2A; Eckhart et al. 2011). First, in October 2005, we established 30  
144  $1 \times 0.5 \text{ m}^2$  permanent plots at each of the 20 study populations. The permanent plots were  
arrayed across four to six transects per site, and each plot was 2.5 m apart along a transect.  
Permanent plots were used for annual surveys of seedlings, fruiting plants, and fruits per plant.  
147 Second, additional, haphazardly distributed  $1 \times 0.5 \text{ m}^2$  plots were used each year to supplement  
estimates of fruits per plant from permanent plots, and to identify plants for fruit collection. By  
collecting fruits from plants outside the permanent plots, we did not affect seed input into the  
150 permanent plots.

To estimate the survival of seedlings to fruiting plants, we counted seedlings ( $n_{ijk}$ ) and fruiting  
plants ( $y_{ijk}$ ) in each permanent plot each year from 2006–2020. Seedlings and fruiting plants were  
153 counted in January/February and June, respectively, in plot  $i$ , year  $j$ , and population  $k$ .

Of more than 8000 observations, there were fewer seedlings than fruiting plants in approximately 5% of observations; 50% of these had 1 fewer seedling than fruiting plant (Table S5). There are at least two possible sources of undercounts of seedlings. An observer might miss small seedlings that were present at the January/February seedling census, or additional seedlings emerged after the census. We assume that we did not under- or over-count fruiting plants because plants stand out from the background vegetation in June. To account for the undercount of seedlings, we recoded the data so that the count of seedlings was equal to the number of fruiting plants observed later in the season.

To determine the number of fruits per plant, we counted the number of fruits per plant on up to 15 plants in each of the permanent plots from 2007–2020, and on additional plants in the haphazardly distributed plots from 2006–2020 (Figure 2A). We combined counts from plants in permanent and haphazardly distributed plots, because the latter often sampled a broader distribution of plant sizes and combining them allowed us to better estimate fruit number per plant in years with relatively few plants in permanent plots.

From 2006–2012, we counted the number of undamaged fruits on a plant. We then took the damaged fruits on a plant and visually stacked them end to end to estimate how many additional undamaged fruits that was equivalent to (e.g., two half fruits corresponded to one undamaged fruit). We used this as our count ( $y_{ijk}^{TFE}$ ) of total fruit equivalents on plant  $i$ , in year  $j$ , and in population  $k$ . From 2013–2020, we separately recorded the number of undamaged ( $y_{ijk}^{UF}$ ) and damaged ( $y_{ijk}^{DF}$ ) fruits on a plant.

From 2006–2020, we counted the number of seeds in one undamaged fruit ( $y_{ijk}^{US}$ ) collected from each of 20-30 plants in the haphazardly distributed plots. Our counts corresponded to fruit  $i$ , in year  $j$ , and in population  $k$ . From 2013–2020, we also counted the number of seeds in one damaged fruit ( $y_{ijk}^{DS}$ ) collected from each of 20-30 plants in the haphazardly distributed plots.

### *Field experiments for belowground components of demography*

We conducted a field experiment to estimate seed persistence from fall (October) to winter (January/February), emergence in the winter, and seed persistence from winter to fall (Fig. 2B). At  
180 each population, we buried seeds in mesh bags in the fall, counted intact seeds and seedlings  
in a subset of bags in the winter, and then retrieved those bags the following fall to count intact  
183 seeds and conduct a two-stage lab trial to assay viability of intact seeds. Seed persistence and  
emergence do not incorporate loss of seed viability because seeds that are intact in the field may  
not be viable. We thus combine the field and lab experiments to estimate seed survival and  
186 germination, which do account for loss of viability.

The experiment consisted of three rounds starting in October 2005, 2006, or 2007. For each  
round, we collected seeds at each population in summer before the round started. For each  
189 population, we pooled and distributed seeds across 5×5-cm nylon mesh bags (100 seeds/bag). In  
October, we returned the bags to the population at which the which seeds were collected, staked  
one bag near each permanent plot (Methods: Field surveys for aboveground demography) and  
192 covered the bags with soil.

In Round 1, we placed 30 bags at each population in October 2005. We unearthed a first set of  
10 bags in January 2006 to count the number of intact seeds ( $y$ ) and the number of seedlings ( $y_g$ )  
195 (Age 0 in Fig. 2B). We returned the bags to the ground until October 2006, when we retrieved  
bags to the lab to count intact seeds ( $y$ ) and test seed viability (see below). In the second year of  
Round 1, we counted intact seeds and seedlings in a second set of 10 bags unearthed in January  
198 2007 (Age 1 in Fig. 2B). We again returned these bags to the ground until October 2007, when we  
retrieved these 10 bags to count intact seeds and test seed viability. In the third year of Round 1,  
a third set of 10 bags was unearthed in January 2008 to count intact seeds and seedlings (Age 2  
201 in Fig. 2B), and brought to the lab in October 2008 for seed counts and viability tests.

The experiment was repeated in all populations two more times. Round 2 started in October  
2006 with 20 bags per population, and 10 bags were dug up in the first and second year (2007 and

204 2008, respectively). Round 3 started in October 2007 with 10 bags per population, and 10 bags  
each were dug up after one year (2008). We thus made three sets of observations associated with  
age 0 seeds (brought to the lab after one year in the field), two sets of observations associated  
207 with age 1 seeds (brought to the lab after two years in the field), and one set of observations  
associated with age 2 seeds (brought to the lab after three years in the field).

In October of each experimental year, the seeds remaining intact in the subset of bags that  
210 were brought to the lab were counted and tested for viability in a two-stage trial (Fig. 2B). We  
placed up to 15 seeds from each bag on moist filter paper in a disposable cup; over a 10-day  
span, we counted and removed germinants every two days. Because we conducted 2-3 tests of  
213 15 seeds each per bag, we summed the number of seeds tested ( $n_g^{\text{viab}}$ ) and germinating ( $y_g^{\text{viab}}$ ) to  
summarize the trials and successes.

After 10 days, up to 10 remaining ungerminated seeds were sliced in half and individually  
216 placed into 96-well plates filled with a solution of tetrazolium chloride, which stains viable tissue  
red. We covered the plates with foil. Each 96-well plate contained seed from at least one bag per  
population of a given seed-age class. We counted viable seeds every 2 days for 10 days. For each  
219 bag, we summed the number of seeds tested ( $n_v^{\text{viab}}$ ) and staining ( $y_v^{\text{viab}}$ ) to summarize the trials  
and successes.

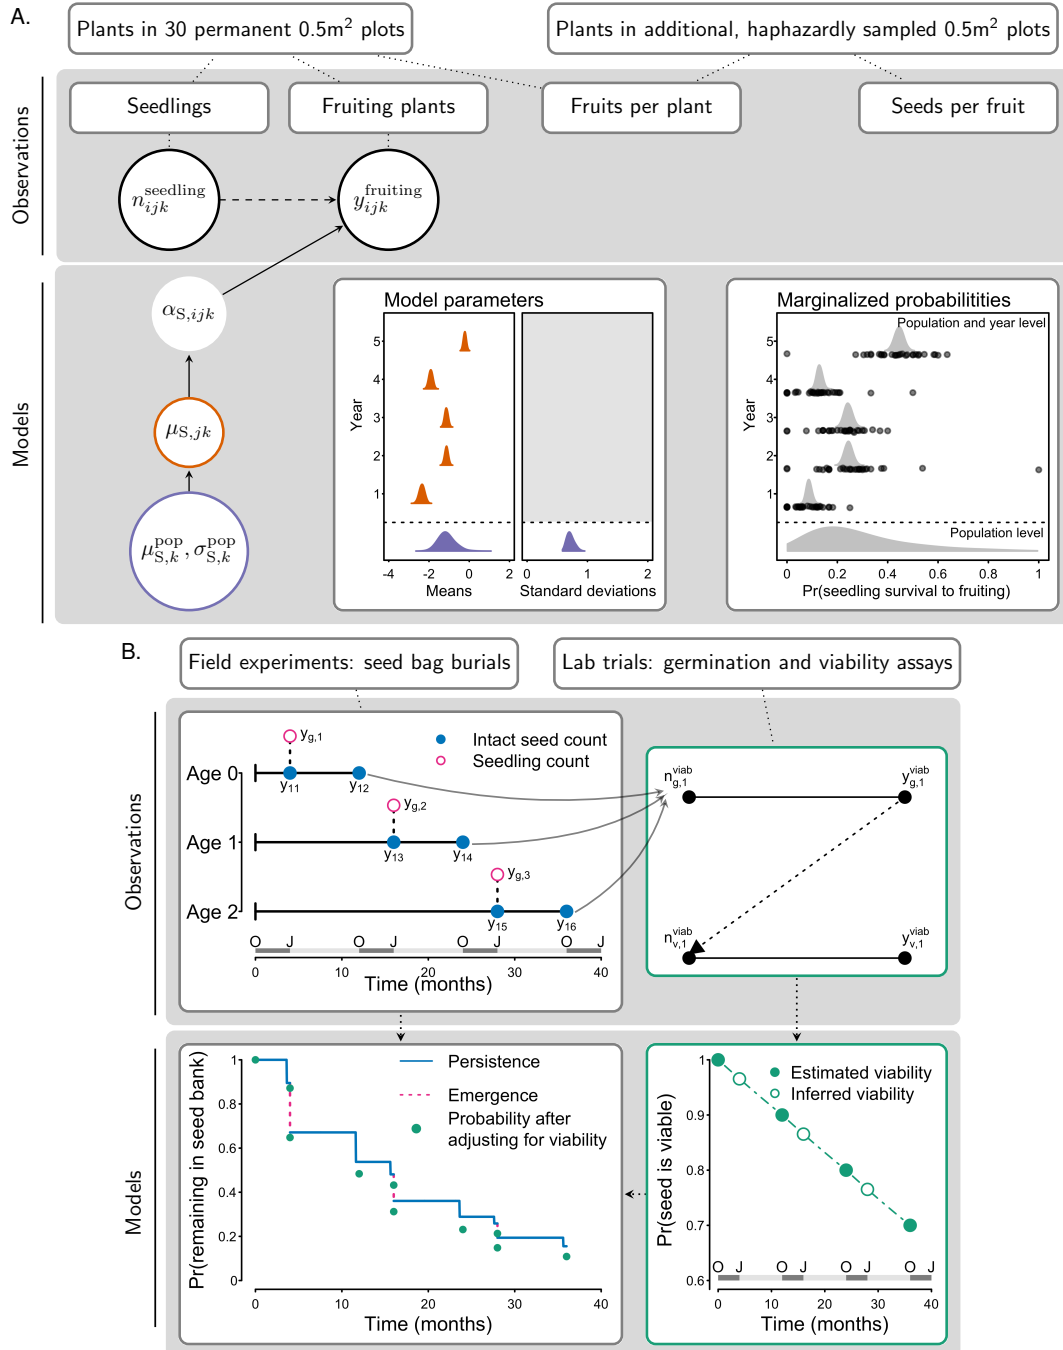

Figure 2: Graphical summary of the observations, models, and parameters used to estimate per-capita reproductive success, germination, and seed survival. (A) A graphical representation of the relationship between the structure of observations and the data. A directed acyclic graph for the model of seedling survival to fruiting, with colors corresponding to the simulated example in the plots showing the relationship between model parameters, marginalized probabilities, and data. (B) A graphical representation of the field seed bag experiments and lab viability trials. The experiments are related to estimates of seed survival, germination, and viability.

## Statistical models

222 We used observational and experimental data from 20 populations to estimate the demographic parameters that describe the life cycle (Fig. 2). To calculate variation in per-capita reproductive success for the study populations, we obtained annual estimates for seedling survival to  
225 fruiting, fruits per plant, and seeds per fruit from the field surveys. Because our goal was to compare patterns of seed bank dynamics among populations, we obtained population-level estimates for germination and seed survival from the seed bag burial experiment. We refer readers  
228 to Appendix S2 for a description of the statistical models, directed acyclic graphs, and for the mathematical expressions for the posterior proportional to the joint distribution for all the models.

### 231 *Aboveground components of demography*

We used a hierarchical, Bayesian approach to fit models to observations of seedling survival, fruits per plant, and seeds per fruit. As an example, we describe the structure of the model  
234 for seedling survival to fruiting, which is essentially a generalized linear mixed model with a binomial likelihood and a logit link (Fig. 2A). We use directed acyclic graphs (DAGs) to illustrate the relationship between the observations, the model, and parameters of interest. In the field,  
237 we counted seedlings ( $n_{ijk}^{\text{seedlings}}$ ) and fruiting plants ( $y_{ijk}^{\text{fruiting}}$ ) in plot  $i$ , year  $j$ , and population  $k$ . These quantities are outlined in black in the DAG and are shown as black points in the corresponding graphs. The model uses a binomial likelihood and relates the data to a probability  
240 of survival,  $\alpha_S$ . This parameter is logit-transformed and links the year-level distribution, outlined in orange, to the observations. Parameters for the year-level distribution are annual estimates of the mean, which are drawn from the population-level distribution, outlined in purple. We  
243 write the model using hierarchical centering to account for the structure of our observations and for computational efficiency (Evans et al. 2010; Ogle and Barber 2020), but it is equivalent to a random effects structure in which years are nested within populations.

246 The models for fruits per plant and seeds per fruit have a similar hierarchical structure but  
use Poisson likelihoods and a log link (Appendix S2.2.2). We separately modeled observations  
of total fruit equivalents per plant for 2006–2012 and total fruits per plant for 2013–2020. In  
249 years with observations of total fruits per plant, we also estimated the proportion of fruits that  
were undamaged vs. damaged. We estimated undamaged seeds per fruit for 2006–2020, and  
combined those estimates with counts of damaged seeds per fruit to infer the proportion of  
252 seeds that were lost to herbivory for 2013–2020. For each set of observations, we fit separate  
models to each population so that the resulting annual estimates were partially pooled towards  
the population-level mean. To make the two sets of observations for fruits per plant compatible,  
255 we used the proportion of fruits per plant that were damaged and the proportion of seeds lost to  
herbivory on a damaged fruit to calculate total fruit equivalents per plant from 2013–2020.

We chose to fit hierarchical, Bayesian models to our data for several reasons. First, hierarchical  
258 models perform well for making inferences about annual variation in demography (Metcalf et al.  
2015). Second, the study period included substantial variation in sample size (Tables S2-S4, S6-  
S9), including years in which we did not observe plants in permanent plots even when they were  
261 present in the broader population (Fig. 1B). Hierarchical models for seedling survival introduce  
partial pooling, which allows us to account for sampling variation in fitting the model rather  
than post-hoc. Third, our approach makes it straightforward to quantify uncertainty associated  
264 with annual estimates of components of reproductive success. Fourth, estimating germination  
and seed survival from the seed bag experiment required combining three datasets (see below),  
a process that is a strength of Bayesian methods (Hobbs and Hooten 2015).

### 267 *Belowground components of demography*

Estimating seed survival and germination from the seed experiment required combining datasets.  
Here, we describe and graphically illustrate the model that we fit to observations from field ex-  
270 periments (Fig. 2B). The model we fit to the observational data jointly accounts for loss of seeds  
from the seed bank through mortality and germination. Germination occurs once a year in the

winter, and is estimated from the seeds that germinate each year. Mortality occurs throughout  
273 the year, and is estimated from the seeds that remain intact. In Fig. 2B, the model describes the  
stairstep shape of the curve in the lower left panel. In practice, we fit a survival function that is  
the product of discrete germination and mortality hazards (Klein and Moeschberger 2003).

276 Separately, we obtained viability of seeds using the two-stage lab trials. Each lab trial con-  
sisted of two binomial experiments that measured (1) germination of intact seeds and then (2)  
viability of seeds that did not germinate. We combined these estimates to infer viability in each  
279 population and year. The lab trials involved destructive sampling, and we only conducted them  
when bags were retrieved in October (filled points in lower right panel of Fig. 2B). We inferred  
the viability of intact seeds in January by assuming that seeds lost viability at a constant rate (ex-  
282ponential decay). Further, we interpolated between estimates by assuming that viability changed  
at a constant rate between years, and that all seeds were viable at the start of the experiment  
(open points in lower right panel of Fig. 2B).

285 Finally, because plants set seed in July but the field experiments with seed bags did not  
start until October, we did not have direct observations to inform estimates  $s_0$ , the probability  
of seed survival from seed production in July to four months later in October. To infer seed  
288 survival during this part of the life cycle, we combined data from the field surveys and seed bag  
experiments (Elder and Miller 2016). We assumed that the seedlings emerging in permanent  
plots in 2008 were primarily from seeds produced in permanent plots in the previous two years,  
291 2006 and 2007, that survived to and germinated in 2008. We ignored contributions from older  
seeds, assuming for simplicity that they make up a small proportion of seedlings. We used counts  
of fruiting plants in the permanent plots, and estimates of seed set per fruiting plant, to calculate  
294 the average seed set per transect in 2006 and 2007. We then linked seed set, and estimates of  
seed survival and germination from the seed bag burial experiment, to the average number of  
seedlings observed in permanent plots. Once we joined these observations, we inferred  $s_0$  as the  
297 proportion of seeds lost between seed set in July and October.



## *Model statements, implementation, and fitting*

We show the expressions for the posterior proportional to the joint distribution, and correspond-  
300 ing directed acyclic graphs, for all models in Appendix S2. Prior choice is described in Ap-  
pendix S3, and Table S10 shows all parameters with associated priors. We prepared data for  
analysis using the tidyverse (Wickham and RStudio 2021) and tidybayes (Kay and Mastny 2020)  
303 packages in R version 3.6.2 (R Core Team 2019). We wrote, fit all models, and estimated posterior  
distributions using JAGS 4.10 with rjags (Plummer et al. 2019). We used the MCMCvis package  
to work with the model output, check chains for convergence, and recover posterior distributions  
306 (Youngflesh et al. 2021). We randomly generated initial conditions for all parameters with a prior  
by drawing from the corresponding probability distribution in R before passing the initial values  
to rjags. We ran three chains for 45,000 iterations. The first 10,000 iterations were for adapta-  
309 tion, the next 15,000 iterations were discarded as burn-in, and we sampled the following 15,000  
iterations. We assessed convergence of the MCMC samples with visual inspection of trace plots,  
by calculating the Brooks-Gelman-Rubin diagnostic,  $\hat{R}$ , and by calculating the Heidelberg-Welch  
312 diagnostic (Hobbs and Hooten 2015; Elderd and Miller 2016).

## *Computing vital rates*

In the following sections, we describe how we used estimates from the statistical models to  
315 obtain the parameters that describe the *Clarkia xantiana* ssp. *xantiana* life-history. The calculations  
summarized here are described in detail in Appendix S4.

### *Per-capita reproductive success*

318 We calculated annual per-capita reproductive success as the number of seeds produced per  
seedling each year, on average (Gremer and Venable 2014; Venable 2007). In other words, it  
is the product of the annual mean probabilities of seedling survival to fruiting, fruits per plant,  
321 and seeds per fruit. We calculated the posterior mode of annual estimates for each of these

parameters in each year (the orange distribution in Fig. 2A) and multiplied them to obtain the per-capita reproductive success in that year.

324 To compute per-capita reproductive success, we used 15 years of observations from each of  
20 populations. Our observations throughout the study period include missing data that reflects  
natural variability in population size or the spatial distribution of plants at study populations  
327 (Fig. 1B). We accounted for missing data while calculating per-capita reproductive success. In  
some years (n=3), we observed no seedlings or fruiting plants in permanent plots or in additional  
plots distributed haphazardly across the population, while in other years (n=8) we observed  
330 seedlings but no fruiting plants at the population. We assumed that this reflects a true absence  
of fruiting plants in that year and that there was no seed set in these years, so we set fruits  
per plant and seeds per fruit to 0. In one year at one population, we observed a single fruiting  
333 plant with 3 fruits, from which we did not collect seeds. For this estimate, we substituted the  
population average of seeds per fruit. Finally, there were years (n=11) when there were no  
plants in permanent plots but we found plants elsewhere throughout the population. We had  
336 no information about seedling survival in these years, and so used the population's average for  
seedling survival to fruiting.

### *Belowground vital rates*

339 Estimates from the seed bag burial experiment describe persistence, the probability that a seed  
remains intact in the seed bank, and emergence, the probability that an intact seed becomes a  
seedling. To estimate seed survival and germination, which account for loss of seed viability  
342 in our estimates of seed survival and germination, we combined information from the seed  
bag burial experiment and the lab trials (Table S11). First, we estimated the probability that  
seeds persist, or remain intact, in the seed bank (Fig. 2B). We combined estimates for persistence  
345 with the viability estimates to calculate seed survival, the probability that seeds remains intact  
and viable in the seed bank. Similarly, we combined estimates for emergence with viability to  
calculate germination, the probability that viable, intact seeds become seedlings. We used the

348 seed survival ( $s_1, s_2, s_3$ ) and germination ( $g_1$ ) probabilities to test predictions from bet hedging theory. Because seed survival from seed set in July to October ( $s_0$ ) implicitly included loss of seed viability, we did not adjust these estimates.

## 351 *Analysis*

### *Demographic test of bet hedging*

We used estimates for the vital rate components to test whether delayed germination is an adaptive bet hedging trait in *Clarkia xantiana* ssp. *xantiana*. The life-history described by equation 1 incorporates a seed bank. Specifically, populations form a seed bank by delaying germination (i.e.  $g_1 < 1$ ). Immediate germination ( $g_1 = 1$ ) eliminates the seed bank, in which case equation 1 reduces to

$$\lambda = \frac{N(t+1)}{N(t)} = Y(t)s_0s_1. \quad (2)$$

Per capita reproductive success,  $Y(t)$ , is calculated as the product of seedling survival to fruiting, fruits per plant, and seeds per fruit. We tested whether delayed germination ( $g_1 < 1$ ) functions as bet hedging by eliminating the seed bank (Eq. 2). If delayed germination is consistent with bet hedging, we expect eliminating the seed bank to increase arithmetic mean fitness, increase the variability in fitness, and decrease the long-term stochastic population growth rate (Clauss 1999; Evans et al. 2007).

To calculate the arithmetic mean population growth rate, we calculated an average environment growth rate,  $\lambda_a$  (Evans et al. 2007). We assumed that each of the 15 values for per-capita reproductive success,  $Y(t)$ , are equally likely. We obtained values for the average population growth rate with the field estimates of germination as well as with the seed bank eliminated ( $g_1 = 1$ ). In each case, we used the posterior modes of the parameters in equations 1 or 2.

To calculate temporal variability in population growth rate, we drew 1,000 samples from the 15 years of per-capita reproductive success estimates with replacement. We paired these resampled years of estimates with the population-level values for germination and seed survival

rates to calculate annual population growth rates. For both the case with and the case without a seed bank, we calculated the variance of the sequence of population growth rates.

375 To calculate the long-term stochastic population growth rate, we used the same sequence of population growth rates that we used to calculate temporal variability in fitness. We calculated the long-term stochastic population growth rate with the field estimates of germination, as well  
378 as with the seed bank eliminated ( $g_1 = 1$ ). We used the following equation to calculate the stochastic population growth rate

$$\lambda_s = \exp\left(\frac{\sum \log\left(\frac{N(t)}{N(t-1)}\right)}{1000}\right) = \exp\left(\frac{\sum \log(\lambda)}{1000}\right). \quad (3)$$

381 To examine the effect of uncertainty about parameter estimates on our results, we used the full posterior distribution for parameter estimates to calculate the arithmetic mean growth rate, temporal variability in population growth rate, and long-term stochastic population growth rate  
384 (Appendix S5.1).

### *Density-independent model for germination fractions*

We calculated the optimal germination fraction for the observed variation in reproductive success  
387 and seed survival. For each population, we used a sequence of 1,000 resampled values for per-capita reproductive success,  $Y(t)$ , and the observed seed survival probabilities,  $s_0$ ,  $s_1$ ,  $s_2$ , and  $s_3$ , to calculate population growth rates at each germination fraction,  $G$ , along an evenly  
390 spaced grid of values from 0 and 1. Temporal variation was incorporated into the model by resampling per-capita reproductive success,  $Y(t)$ . The optimal germination fraction is the value of  $G$  that maximizes the geometric mean of the population growth rate. We found the optimal  
393 germination fraction by using a one-dimensional optimization algorithm to find the optimal  $G$  between 0 and 1 (Brent 1973). For each population, we replicated the optimization 50 times; each time, we drew a new sequence of years,  $Y(t)$  and recalculated  $G$ . To summarize the results for  
396 each population, we calculated the median and 95% percentile intervals of these replicates. To

evaluate the relationship between the optimal and observed germination fractions, we calculated the Pearson correlation coefficient between the median of the optimal  $G$  and the posterior mode  
399 of  $g_1$ .

To assess the influence of parameter uncertainty on optimal germination fractions, we examined how optimal  $G$  varied when we sampled from the posterior distribution of each parameter  
402 in the population model (Appendix S5.2). For each sample, we found the optimal germination fraction,  $G$ , for 50 replicates.

#### *Correlation between germination and seed survival*

405 We tested whether observed germination,  $g_1$  was negatively correlated with seed survival,  $s_2s_3$ . We calculated the probability that seeds which do not germinate in January remain in the seed bank until the following January. We obtained the posterior distribution for the correlation  
408 between germination and seed survival by calculating the sample correlation of  $g_1$  and  $s_2s_3$  at each iteration of the MCMC output.

#### *Correlation between germination and variability in per-capita reproductive success*

411 We tested whether observed germination,  $g_1$  was negatively correlated with the temporal variability in per-capita reproductive success for each population. We estimated variability by sampling the posterior distribution of reproductive success for each year and calculating the geometric  
414 SD of per capita reproductive success as  $\exp(\text{SD}(\log(\text{per capita reproductive success}+0.5)))$ . We obtained the sample correlation of germination and geometric SD of per capita reproductive success at each iteration of the MCMC output.

417

## Results

### *Demographic test of bet hedging*

To determine whether the seed bank meets the criteria for bet hedging, we compared the arithmetic mean population growth rate, variance in population growth rate, and long-term stochastic population growth rate with and without a seed bank. The arithmetic mean growth rate was greater without a seed bank than with a seed bank (Fig. 3A). The variability in population growth rates was also greater without a seed bank than with a seed bank (Fig. 3B). However, the long-term stochastic population growth rate was not always higher with a seed bank (Fig. 3C); the stochastic population growth rate was only greater with a seed bank in 7 out of 20 populations. These results were robust to uncertainty in parameter estimates (Fig. S7).

### *Observed germination fractions are lower than predicted by a density-independent model*

To evaluate the density-independent model, we compared observed germination to predicted germination optima (Fig. 4). Optimal germination fractions were less than 1 in 13 out of 20 populations (Fig. 4). Optimal and observed germination fractions were uncorrelated (Fig. 4;  $r=-0.158$ ,  $p=0.507$ ). Predictions from the density-independent model were higher than observed germination fractions. These results were robust to uncertainty in parameter estimates, in most populations, but parameter uncertainty produced a wide range of optimal germination fractions for GCN and FR (Fig. S8).

### *Germination and seed survival are uncorrelated*

To assess the relationship between germination and risk experienced by seeds that remain in the seed bank, we calculated the correlation between germination fraction and seed survival. We did

not observe a correlation between germination and seed survival in the seed bank (Fig. 5A). The 95% credible interval for the posterior distribution of the correlation between germination and  
441 seed survival overlapped 0.

### *Germination and variability in per-capita reproductive success are uncorrelated*

To assess the relationship between germination and risk experienced after germination, we calculated the correlation between germination fraction and geometric standard deviation in per-  
444 capita reproductive success. The correlation between germination and geometric standard deviation in per-capita reproductive success was negative (Fig. 5B). However, the 95% credible interval  
447 for the posterior distribution of the correlation overlapped 0, indicating that there was not strong support for a non-zero correlation between germination and variability in reproductive success.

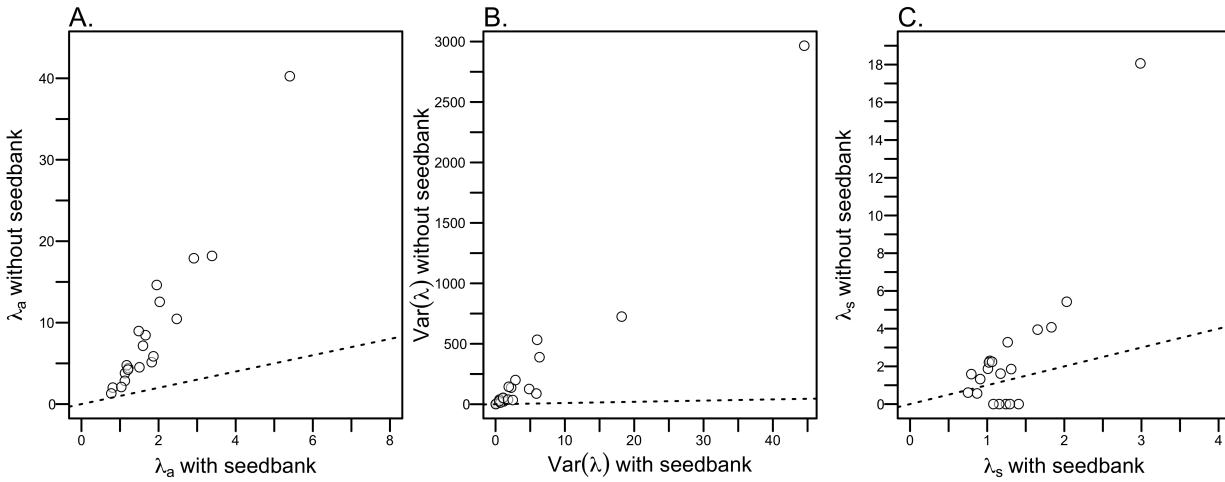

Figure 3: Test of the demographic patterns expected with bet hedging. (A) Plot of the arithmetic population growth rate without a seed bank against arithmetic population growth with a seed bank. (B) Plots of the variance in annual population growth rate without a seed bank against the variance in population growth rate with a seed bank. (C) Plot of the long-term stochastic population growth rate without a seed bank against the long-term stochastic growth rate without a seed bank. In all plots, the dotted line is the 1:1 line.



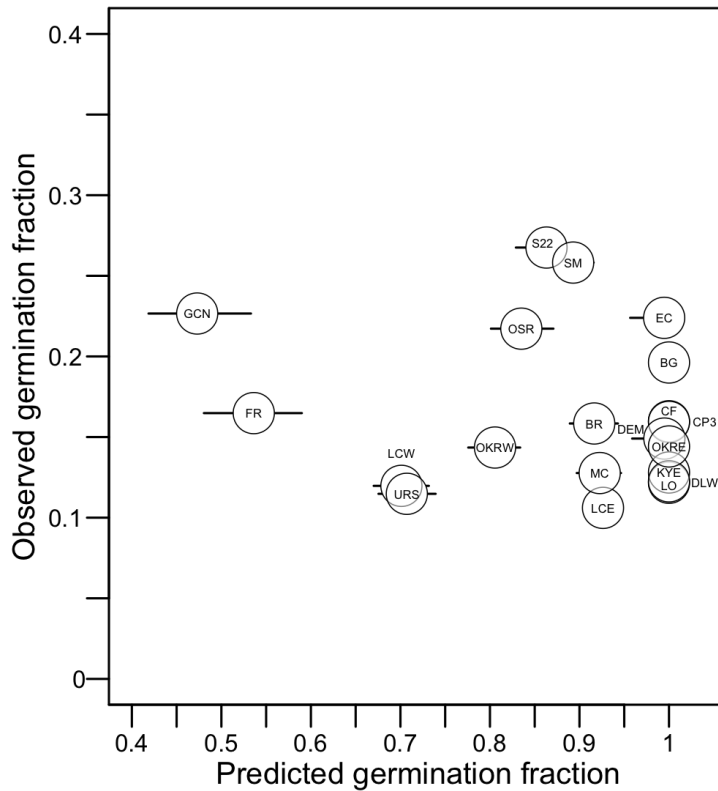

Figure 4: Comparison of observed and predicted, optimal germination fractions from a density-independent model of bet hedging. For each population, the observed germination fraction,  $g_1$ , is estimate from the model for seed bank vital rates. Each point is the population-specific mode of the posterior of  $g_1$  for a model fit to data from seed bag experiments from 2005-2008 plotted against the predicted, optimal germination fractions. For each population, we found the optimal germination fraction for a density-independent population model. We ran 1000 replicates in which we resampled the annual estimates of per-capita reproductive success. Values for predicted germination fractions are the medians of these replicates, and the error bars are the 95% percentile intervals.

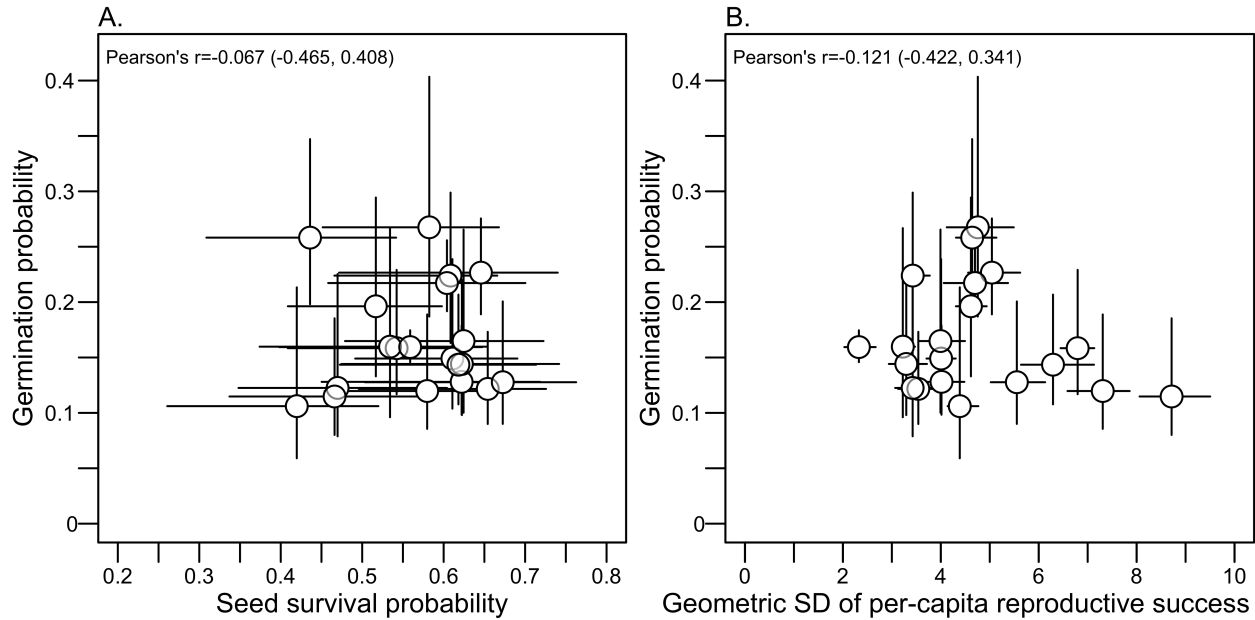

Figure 5: Relationship between germination and seed survival, and between germination and the geometric standard deviation of per-capita reproductive success. (A) The observed germination probability,  $g_1$ , plotted against probability of seed survival,  $s_2s_3$ . (B) Correlation between observed germination probability,  $g_1$ , and the geometric standard deviation of per-capita reproductive success, a measure of the temporal variability in per-capita reproductive success. In both panels, points are the posterior modes; error bars are the 68% highest posterior density intervals (under a normal distribution, 68% of the distribution is within  $\pm 1$  standard deviation).

## Discussion

450 We used an extensive demographic dataset to conduct an unusually comprehensive test of whether bet hedging explained germination patterns among populations of *Clarkia xantiana* ssp. *xantiana*. All 20 populations in our study exhibit delayed germination. However, we found weak  
453 support for the expected trade-off between arithmetic and geometric mean fitness, mixed support that delayed germination acts as bet hedging, and no evidence that observed germination fractions are adaptive under a density-independent bet hedging model. Observed germination  
456 fractions were also uncorrelated with risk experienced by seeds that remain in the seed bank or by plants after germination. Collectively, we interpret our results to suggest that delayed germination acting as bet hedging alone is insufficient to explain germination patterns among our  
459 study populations.

### *Demographic test of bet hedging*

To determine if delayed germination functions as bet hedging in each population, we tested for a  
462 trade-off between arithmetic and geometric mean population growth rate mediated by reduced variability in population growth rate (Cohen 1966; Philippi and Seger 1989). We observed average germination fractions below 0.3 in all populations. However, our demographic analysis failed to  
465 demonstrate the expected trade-off between mean and stochastic population growth rate, despite 15 years of observations of reproductive success (Table 3). We evaluated a strategy with the observed germination fraction against a strategy with no seed bank (Evans et al. 2007). Delayed  
468 germination reduced average population growth rate (Fig. 3A) and variance in reproductive success (Fig. 3B). But for most populations, delayed germination did not increase long-term stochastic population growth rate (Fig. 3C).

471 *Observed germination fractions are lower than predicted by bet hedging models*

To complement the demographic test of bet hedging, we calculated the optimal germination fractions that maximize each population's growth rate (Childs et al. 2010; Simons 2011). We derived  
474 these optimal germination fractions by parameterizing density-independent population models with estimates of seed survival and reproductive success (Gremer and Venable 2014). Some delayed germination was favored by the observed levels of seed mortality and temporal variability  
477 in reproductive success in 13 populations (Fig. 4; Table 3). Relative to the demographic test, the optimal germination fractions thus provide slightly more support for the idea that delayed germination acts as bet hedging. However, even when we predicted optimal germination fractions  
480 less than one, these were still much higher than germination fractions observed in the field. We may have underestimated germination if we missed seedlings that died before, or if there was additional germination after, our annual census of seed bags. But the predicted germination  
483 fractions are 2 to 5 times the observed fractions, and we think it is unlikely that we underestimated germination to this extent. We also did not find the expected positive correlation between observed and predicted germination fractions. Jointly, we interpret these results to suggest that  
486 even when delayed germination is favored, the observed germination fractions are lower than would be adaptive under density-independent bet hedging alone. Our results also parallel the findings in Gremer and Venable (2014) that density-independent models tend to predict higher  
489 germination fractions than observed in the field.

*Germination and risk across the life cycle*

Under bet hedging, we expected that seeds from populations that experienced a greater degree of  
492 risk in the seed bank would have lower germination fractions (Cohen 1966; Gremer and Venable 2014; Venable 2007). While high mortality risk in the soil seed bank should select against delayed germination, we did not find support for the expected relationship among germination and  
495 seed survival (Fig. 5A; Table 3). Some populations with low seed survival also exhibited low

germination (e.g., FR, BR, SM), while some populations with high seed survival also had high germination (e.g., S22, CP3).

498 High variability in per-capita reproductive success should also select for delayed germination (Cohen 1966). However, in our study populations, variability in reproductive success was uncorrelated with germination (Fig. 5B; Table 3). We observed similar germination fractions  
501 (approximately 0.1) for populations with very different levels of variability in reproductive success (similar germination probabilities for a range of geometric standard deviations from 3-9 in Fig. 5B). Lack of support for this prediction is consistent with other results in our study. Populations with low variability in reproductive success and low germination were often the same  
504 populations that did not experience complete reproductive failure (Fig. 1B), for which stochastic population growth rates were higher without a seed bank, and for which we predicted high  
507 optimal germination fractions (e.g., OKRE, CP3 in Fig. 4).

#### *Temporal variability in reproductive success*

Delayed germination decreases arithmetic mean fitness, and the variance in fitness, because it  
510 dampens the effect of years with low per-capita reproductive success. To meet the criteria for bet hedging, delayed germination should also increase geometric mean fitness; whether it does so depends strongly on the minimum reproductive success or probability of reproductive failure  
513 (Childs et al. 2010; Cohen 1966; Evans et al. 2007). At the extreme, if there is no risk of reproductive failure, a strategy with delayed germination should always have lower geometric mean fitness than one with full germination. All populations in which stochastic population growth rate without a seed bank is lower than with a seed bank (URS, LCW, LCE, OKRW, FR, GCN, SM; Fig. 3C) either experienced reproductive failure or had no seedlings survive in permanent plots in at least one year (Fig. 1B). In contrast, populations in which stochastic population growth rate  
519 without a seed bank is higher than with a seed bank include those populations that either had some plants survive in permanent plots (LO) or populations in which plants set seed in all years. Although our demographic observations were exceptionally broad, 15 years of observations may

522 have been insufficient to encounter reproductive failure in some populations. Our measurements  
may thus be conservative for testing predictions of bet hedging theory.

At the same time, California is experiencing an ongoing drought and the 2005-2020 study  
525 period included precipitation anomalies with severe ecological impacts (Cook et al. 2015; Prugh  
et al. 2018; Williams et al. 2022). Studies of bet hedging through delayed germination often  
assume precipitation variability is a primary driver of variability in fitness (e.g., Clausen and  
528 Venable 2000; Philippi 1993b; Tielbörger et al. 2012; Venable 2007). If this were the case in *C.*  
*xantiana* ssp. *xantiana*, our study should have had a high chance of observing its effects on  
reproductive success. Instead, it is possible that precipitation alone may not be enough to explain  
531 variation in reproductive success in some populations.

### *Seed mortality across the life cycle*

While seed mortality in the seed bank after seeds have had the opportunity to germinate selects  
534 against delayed germination, seed mortality before seeds have had the opportunity to germinate  
favors the evolution of delayed germination (Gremer and Venable 2014). Seed mortality after  
the germination opportunity is a risk borne by seeds that remain in the seed bank. In contrast,  
537 seed mortality between seed production and the germination opportunity discounts reproductive  
success. It may thus be safer for a seed to remain in the seed bank if there is substantial seed  
mortality between seed set and the opportunity to germinate.

540 We conducted a follow-up analysis that shows the optimal germination fractions we predicted  
are more sensitive to estimates of seed survival before than after germination (Appendix S5.3).  
Optimal germination fractions could thus be lower than we predicted if we overestimated seed  
543 survival before germination ( $s_0$  or  $s_1$ ). To estimate survival from seed production in June/July  
to burial in October,  $s_0$ , we combined observations from surveys and field experiments. We may  
have overestimated survival if our approach failed to fully capture mortality due to seed preda-  
546 tion. In addition, the seed bag burial experiments could have overestimated seed survival from  
October to January,  $s_1$ , if deep burial of seeds is a major source of loss from the seed bank, as bags

prevent seeds from mixing into the soil. However, the experiments may underestimate survival if  
549 seed densities in bags are high enough to promote the growth of pathogenic fungi (Van Mourik  
et al. 2005). These caveats could also affect estimates of seed survival after germination ( $s_2$  or  $s_3$ ),  
but the optimal germination fraction is not as sensitive to these parameters.

### 552 *Intra- and interspecific interactions shape optimal germination fractions*

In this study, we considered a density-independent model of bet hedging, which is particu-  
larly sensitive to variability in reproductive success resulting from complete reproductive fail-  
555 ure (Cohen 1966). However, density-dependence can also affect the value of delaying germina-  
tion because competitors may alter reproductive success; years that would otherwise be good  
for growth and reproduction may become less favorable if there is strong competition (Ellner  
558 1985*a,b*). Although our estimates of per-capita reproductive success implicitly incorporate the  
effects of density (Ellner 1985*b*), we did not explicitly model density-dependence in reproductive  
success. Optimal germination fractions may thus be lower than we predicted in this study if we  
561 were to calculate evolutionary stable strategies that account for competition (e.g., Gremer and  
Venable 2014).

More broadly, competitive and facilitative interactions with intra- and inter-specific plant  
564 neighbors, as well as with pollinators, herbivores, and seed predators, could all modify the  
temporal variability of reproductive success. Reproductive success in *C. xantiana* ssp. *xantiana*  
is affected by plant neighbors (James and Geber 2021), mammalian herbivores (Benning et al.  
567 2019), and insect pollinators (Moeller 2004). If these interactions amplify variability in per-capita  
reproductive success, they could also favor lower germination fractions than those we predicted  
here (Brown and Venable 1991). Crucially, we would need to measure and model the temporal  
570 variability in the effect of these interactions in order to understand their impact on the evolution  
of delayed germination.

### *Phenotypic plasticity in germination*

573 To test bet hedging theory, we estimated fixed, population-level germination fractions with field experiments in which we collected and buried seeds in the same population. While we assumed that the germination fractions reflected genetic differentiation among populations, germination phenotypes are influenced by seed genotype, maternal genotype, and offspring or maternal environment (Clauss and Venable 2000; Lampei et al. 2017; Philippi 1993a; Tielbörger and Petru 2010; Tielbörger et al. 2012). We could not partition the relative contribution of these influences in this study but, in general, germination phenotypes of *C. xantiana* ssp. *xantiana* do exhibit plasticity. In the field, germination varies interannually with rainfall (Geber and Eckhart 2005) and among microsites (James et al. 2020). In the lab, germination responds to water potential and temperature (I. Vergara and V. M. Eckhart, *unpublished data*). If germination reflects a response to environmental cues such as these, the distribution of those cues in the study years would determine the observed germination fractions (Clauss and Venable 2000). Studies that experimentally partition phenotypic variation in germination phenotypes of *C. xantiana* ssp. *xantiana* would be extremely valuable in complementing the present work.

Our results suggest that variation in germination fractions among populations of *Clarkia xantiana* ssp. *xantiana* is unlikely to be explained exclusively by bet hedging. Instead, we hypothesize that germination strategies are likely shaped by the combined influence of bet hedging and plasticity. Bet hedging assumes that the reproductive success is unpredictable at the time of germination (Cohen 1966). If germination responds to environmental cues that also predict reproductive success, plasticity should evolve in accordance to the correlation between the cue and fitness; such adaptive germination plasticity is termed predictive germination (Cohen 1967; Venable and Lawlor 1980). Empirical studies suggest that germination strategies may often be a mix of bet hedging and predictive germination (Clauss and Venable 2000; Evans et al. 2007; Gremer et al. 2016; Simons 2014). More generally, strategies are expected to combine bet hedging and plasticity in proportion to the uncertainty and predictability in the environment (Donaldson-Matasci et al.



2013; Tufto 2015).

To incorporate predictive germination into our bet hedging model, we could build on the  
600 approach taken by Gremer et al. (2016). Briefly, we would estimate annual germination frac-  
tions and retain the observed correlation between germination and reproductive success when  
calculating population growth rates. Estimating the correlation between germination and repro-  
603 ductive success would require more data than we have with the three years of seed bag burial  
experiments. While it is beyond the scope of the present study, examining how bet hedging and  
plasticity jointly contribute to the evolution of delayed germination in *C. xantiana* ssp. *xantiana*  
606 would be an excellent task for future work.

## Acknowledgments

We thank A. A. Agrawal, S. P. Ellner, T. E. X. Miller, and W. F. Morris for conversations and  
609 feedback on the study. We appreciate feedback from K. E. Eisen, A. R. M. James, and R. Petipas  
during project development. We thank the field assistants, and undergraduate students and  
graduate students from Cornell University, Grinnell College, and the University of Minnesota,  
612 who contributed to the field surveys and experiments described in this study. G. Siegmund was  
supported by a Graduate Research Fellowship (DGE-1144153) from the U.S. National Science  
Foundation, and a Presidential Life Science Fellowship and Cornell Fellowship from Cornell  
615 University. The research was funded by U.S. National Science Foundation grants DEB-0515428,  
DEB-1256288 and DEB-1754299 to M. A. Geber, DEB-0515409, DEB-1256316, and DEB 1754157 to  
V. M. Eckhart, and DEB-0515466, DEB-1255141 and DEB-1754026 to D. A. Moeller.

## 618 Author contributions

GS and MAG conceived of the ideas and analysis, using data collected by MAG, VME, and DAM.  
GS analyzed the data with input from MAG; GS wrote the manuscript with input from MAG.  
621 All authors contributed critically to the drafts.

## Literature Cited

- Benning, J. W., V. M. Eckhart, M. A. Geber, and D. A. Moeller. 2019. Biotic interactions contribute  
624 to the geographic range limit of an annual plant: Herbivory and phenology mediate fitness  
beyond a range margin. *The American Naturalist* 193:786–797.
- Brent, R. P. 1973. Algorithms for minimization without derivatives. Prentice-Hall, Englewood  
627 Cliffs, N.J.
- Brown, J. S., and L. D. Venable. 1991. Life history evolution of seed-bank annuals in response to  
seed predation. *Evolutionary Ecology* 5:12–29.
- 630 Bulmer, M. G. 1984. Delayed germination of seeds: Cohen’s model revisited. *Theoretical Popu-  
lation Biology* 26:367–377.
- Childs, D. Z., C. J. E. Metcalf, and M. Rees. 2010. Evolutionary bet-hedging in the real world:  
633 Empirical evidence and challenges revealed by plants. *Proceedings of the Royal Society B:  
Biological Sciences* 277:3055–3064.
- Clauss, M. J. 1999. Life history strategies in variable environments: Demography, delayed germi-  
636 nation and bet-hedging in a desert annual *Plantago*. Ph.D. thesis. The University of Arizona.
- Clauss, M. J., and D. L. Venable. 2000. Seed germination in desert annuals: An empirical test of  
adaptive bet hedging. *The American Naturalist* 155:168–186.
- 639 Cohen, D. 1966. Optimizing reproduction in a randomly varying environment. *Journal of Theo-  
retical Biology* 12:119–129.
- . 1967. Optimizing reproduction in a randomly varying environment when a correlation  
642 may exist between the conditions at the time a choice has to be made and the subsequent  
outcome. *Journal of Theoretical Biology* 16:1–14.

- 645 Cook, B. I., T. R. Ault, and J. E. Smerdon. 2015. Unprecedented 21st century drought risk in the  
American Southwest and Central Plains. *Science Advances* 1:e1400082.
- Donaldson-Matasci, M. C., C. T. Bergstrom, and M. Lachmann. 2013. When unreliable cues are  
good enough. *The American Naturalist* 182:313–327.
- 648 Eager, E. A., R. Rebarber, and B. Tenhumberg. 2014. Modeling and analysis of a density-  
dependent stochastic integral projection model for a disturbance specialist plant and its seed  
bank. *Bulletin of Mathematical Biology* 76:1809–1834.
- 651 Eckhart, V. M., M. A. Geber, W. F. Morris, E. S. Fabio, P. Tiffin, and D. A. Moeller. 2011. The  
geography of demography: Long-term demographic studies and species distribution models  
reveal a species border limited by adaptation. *The American Naturalist* 178:S26–S43.
- 654 Elderd, B. D., and T. E. Miller. 2016. Quantifying demographic uncertainty: Bayesian methods  
for integral projection models. *Ecological Monographs* 86:125–144.
- Ellner, S. 1985*a*. ESS germination strategies in randomly varying environments. I. Logistic-type  
657 models. *Theoretical Population Biology* 28:50–79.
- . 1985*b*. ESS germination strategies in randomly varying environments. II. Reciprocal  
yield-law models. *Theoretical Population Biology* 28:80–116.
- 660 Evans, M. E. K., and J. J. Dennehy. 2005. Germ banking: Bet-hedging and variable release from  
egg and seed dormancy. *The Quarterly Review of Biology* 80:431–451.
- Evans, M. E. K., R. Ferrière, M. J. Kane, and D. L. Venable. 2007. Bet hedging via seed banking  
663 in desert evening primroses (*Oenothera*, Onagraceae): Demographic evidence from natural  
populations. *The American Naturalist* 169:184–194.
- Evans, M. E. K., K. E. Holsinger, and E. S. Menges. 2010. Fire, vital rates, and population viability:  
666 A hierarchical Bayesian analysis of the endangered Florida scrub mint. *Ecological Monographs*  
80:627–649.

- Fernández-Pascual, E., B. Jiménez-Alfaro, J. Caujapé-Castells, R. Jaén-Molina, and T. E. Díaz.  
669 2013. A local dormancy cline is related to the seed maturation environment, population genetic  
composition and climate. *Annals of Botany* 112:937–945.
- Franch-Gras, L., E. M. García-Roger, M. Serra, and M. José Carmona. 2017. Adaptation in re-  
672 sponse to environmental unpredictability. *Proceedings of the Royal Society B: Biological Sci-*  
*ences* 284:20170427.
- Geber, M. A., and V. M. Eckhart. 2005. Experimental studies of adaptation in *Clarkia xantiana*: II.  
675 Fitness variation across a subspecies border. *Evolution* 59:521–531.
- Gould, B., D. A. Moeller, V. M. Eckhart, P. Tiffin, E. Fabio, and M. A. Geber. 2014. Local adaptation  
and range boundary formation in response to complex environmental gradients across the  
678 geographical range of *Clarkia xantiana* ssp. *xantiana*. *Journal of Ecology* 102:95–107.
- Gremer, J. R., A. Chiono, E. Suglia, M. Bontrager, L. Okafor, and J. Schmitt. 2020. Variation in the  
seasonal germination niche across an elevational gradient: The role of germination cueing in  
681 current and future climates. *American Journal of Botany* 107:350–363.
- Gremer, J. R., S. Kimball, and D. L. Venable. 2016. Within-and among-year germination in Sono-  
ran Desert winter annuals: Bet hedging and predictive germination in a variable environment.  
684 *Ecology Letters* 19:1209–1218.
- Gremer, J. R., and D. L. Venable. 2014. Bet hedging in desert winter annual plants: Optimal  
germination strategies in a variable environment. *Ecology Letters* 17:380–387.
- 687 Hobbs, N. T., and M. B. Hooten. 2015. *Bayesian models: A statistical primer for ecologists*.  
Princeton University Press, Princeton, New Jersey.
- James, A. R. M., T. E. Burnette, J. Mack, D. E. James, V. M. Eckhart, and M. A. Geber. 2020. Species-  
690 specific variation in germination rates contributes to spatial coexistence more than adult plant  
water use in four closely related annual flowering plants. *Journal of Ecology* 108:2584–2600.

- James, A. R. M., and M. A. Geber. 2021. Interactions during growth eclipse interactions during flowering for determining plant fecundity in pollinator-sharing annual plants. preprint, bioRxiv.
- Kalisz, S., and M. A. McPeck. 1993. Extinction dynamics, population growth and seed banks: An example using an age-structured annual. *Oecologia* 95:314–320.
- Kay, M., and T. Mastny. 2020. tidybayes: Tidy data and ‘geoms’ for Bayesian models.
- Klein, J. P., and M. L. Moeschberger. 2003. Survival analysis: Techniques for censored and truncated data. 2nd ed. Springer, New York.
- Knies, J. L., V. A. Delesalle, and A. R. Cavaliere. 2004. Seed mass and morphology in outcrossing and selfing species of *Clarkia* (Onagraceae): An SEM study. *International Journal of Plant Sciences* 165:85–96.
- Kramer, H. A. C., D. M. Montgomery, V. M. Eckhart, and M. A. Geber. 2011. Environmental and dispersal controls of an annual plant’s distribution: How similar are patterns and apparent processes at two spatial scales? *Plant Ecology* 212:1887.
- Lampe, C., J. Metz, and K. Tielbörger. 2017. Clinal population divergence in an adaptive parental environmental effect that adjusts seed banking. *New Phytologist* 214:1230–1244.
- Lewis, H. 1962. Catastrophic selection as a factor in speciation. *Evolution* 16:257–271.
- McCue, K. A., and T. P. Holtsford. 1998. Seed bank influences on genetic diversity in the rare annual *Clarkia springvillensis* (Onagraceae). *American Journal of Botany* 85:30–36.
- Metcalf, C. J. E., S. P. Ellner, D. Z. Childs, R. Salguero-Gómez, C. Merow, S. M. McMahon, E. Jongejans, and M. Rees. 2015. Statistical modelling of annual variation for inference on stochastic population dynamics using Integral Projection Models. *Methods in Ecology and Evolution* 6:1007–1017.

- Moeller, D. A. 2004. Facilitative interactions among plants via shared pollinators. *Ecology* 85:3289–3301.
- 717 Nunney, L. 2002. The effective size of annual plant populations: The interaction of a seed bank with fluctuating population size in maintaining genetic variation. *The American Naturalist* 160:195.
- 720 Ogle, K., and J. J. Barber. 2020. Ensuring identifiability in hierarchical mixed effects Bayesian models. *Ecological Applications* 30:e02159.
- Paniw, M., P. F. Quintana-Ascencio, F. Ojeda, and R. Salguero-Gómez. 2017. Accounting for  
723 uncertainty in dormant life stages in stochastic demographic models. *Oikos* 126:900–909.
- Philippi, T. 1993a. Bet-hedging germination of desert annuals: Beyond the first year. *The American Naturalist* 142:474–487.
- 726 ———. 1993b. Bet-hedging germination of desert annuals: Variation among populations and maternal effects in *Lepidium lasiocarpum*. *The American Naturalist* 142:488–507.
- Philippi, T., and J. Seger. 1989. Hedging one’s evolutionary bets, revisited. *Trends in Ecology &*  
729 *Evolution* 4:41–44.
- Pinceel, T., F. Buschke, A. Geerts, J. Vanoverbeke, L. Brendonck, and B. Vanschoenwinkel. 2021. An empirical confirmation of diversified bet hedging as a survival strategy in unpredictably  
732 varying environments. *Ecology* 102:e03496.
- Pironon, S., J. Villellas, W. Thuiller, V. M. Eckhart, M. A. Geber, D. A. Moeller, and M. B. García. 2018. The ‘Hutchinsonian niche’ as an assemblage of demographic niches: Implications for  
735 species geographic ranges. *Ecography* 41:1103–1113.
- Plummer, M., A. Stukalov, and M. Denwood. 2019. rjags: Bayesian graphical models using MCMC.

- 738 Prugh, L. R., N. Deguines, J. B. Grinath, K. N. Suding, W. T. Bean, R. Stafford, and J. S. Brashares.  
2018. Ecological winners and losers of extreme drought in California. *Nature Climate Change*  
8:819–824.
- 741 R Core Team. 2019. R: A language and environment for statistical computing. Vienna, Austria.
- Seger, J., and H. J. Brockman. 1987. What is bet-hedging? *In* *Oxford Surveys in Evolutionary*  
*Biology*, vol. 4. Oxford University Press, Oxford.
- 744 Simons, A. M. 2011. Modes of response to environmental change and the elusive empirical  
evidence for bet hedging. *Proceedings of the Royal Society B: Biological Sciences* 278:1601–  
1609.
- 747 ———. 2014. Playing smart vs. playing safe: The joint expression of phenotypic plasticity and po-  
tential bet hedging across and within thermal environments. *Journal of Evolutionary Biology*  
27:1047–1056.
- 750 Tielbörger, K., and M. Petru. 2010. An experimental test for effects of the maternal environment  
on delayed germination. *Journal of Ecology* 98:1216–1223.
- Tielbörger, K., M. Petru, and C. Lampei. 2012. Bet-hedging germination in annual plants: A  
753 sound empirical test of the theoretical foundations. *Oikos* 121:1860–1868.
- Torres-Martínez, L., P. Weldy, M. Levy, and N. C. Emery. 2017. Spatiotemporal heterogeneity in  
precipitation patterns explain population-level germination strategies in an edaphic specialist.  
756 *Annals of Botany* 119:253–265.
- Tufto, J. 2015. Genetic evolution, plasticity, and bet-hedging as adaptive responses to temporally  
autocorrelated fluctuating selection: A quantitative genetic model. *Evolution* 69:2034–2049.
- 759 Van Mourik, T. A., T. J. Stomph, and A. J. Murdoch. 2005. Why high seed densities within buried  
mesh bags may overestimate depletion rates of soil seed banks. *Journal of Applied Ecology*  
42:299–305.

- 762 Venable, D. L. 2007. Bet hedging in a guild of desert annuals. *Ecology* 88:1086–1090.
- Venable, D. L., and J. S. Brown. 1988. The selective interactions of dispersal, dormancy, and  
seed size as adaptations for reducing risk in variable environments. *The American Naturalist*  
765 131:360–384.
- Venable, D. L., and L. Lawlor. 1980. Delayed germination and dispersal in desert annuals: Escape  
in space and time. *Oecologia* 46:272–282.
- 768 Waples, R. S. 2006. Seed banks, salmon, and sleeping genes: Effective population size in semel-  
parous, age-structured species with fluctuating abundance. *The American Naturalist* 167:118.
- Wickham, H., and RStudio. 2021. tidyverse: Easily install and load the 'tidyverse'.
- 771 Williams, A. P., B. I. Cook, and J. E. Smerdon. 2022. Rapid intensification of the emerging south-  
western North American megadrought in 2020-2021. *Nature Climate Change* 12:232–234.
- Youngflesh, C., C. Che-Castaldo, and T. Hardy. 2021. MCMCvis: Tools to visualize, manipulate,  
774 and summarize MCMC output.

## References Cited Only in the Online Enhancements

- Conn, P. B., D. S. Johnson, P. J. Williams, S. R. Melin, and M. B. Hooten. 2018. A guide to Bayesian  
777 model checking for ecologists. *Ecological Monographs* 88:526–542.
- Elder, B. D., and T. E. Miller. 2016. Quantifying demographic uncertainty: Bayesian methods  
for integral projection models. *Ecological Monographs* 86:125–144.
- 780 Gabry, J., D. Simpson, A. Vehtari, M. Betancourt, and A. Gelman. 2019. Visualization in Bayesian  
workflow. *Journal of the Royal Statistical Society: Series A (Statistics in Society)* 182:389–402.
- Gelman, A. 2006. Prior distributions for variance parameters in hierarchical models (comment  
783 on article by Browne and Draper). *Bayesian Analysis* 1:515–534.



Gelman, A., D. Simpson, and M. Betancourt. 2017. The prior can often only be understood in the context of the likelihood. *Entropy* 19:555.

786 Lemoine, N. P. 2019. Moving beyond noninformative priors: Why and how to choose weakly informative priors in Bayesian analyses. *Oikos* 128:912–928.

Wesner, J. S., and J. P. F. Pomeranz. 2021. Choosing priors in Bayesian ecological models by  
789 simulating from the prior predictive distribution. *Ecosphere* 12:e03739.

## Tables

Table 1: Vital rate components of the structured population model.

| Component                              | Description                                                                                                               | Data contributing to quantity                                                                                                                                              |
|----------------------------------------|---------------------------------------------------------------------------------------------------------------------------|----------------------------------------------------------------------------------------------------------------------------------------------------------------------------|
| <b>SEED SURVIVAL</b>                   |                                                                                                                           |                                                                                                                                                                            |
| $s_0$                                  | Probability that a seed produced in July of year $t$ is intact and viable in October of year $t$                          | Seed bag burial experiment, viability trials, seedling counts in permanent plots, fruiting plant counts in permanent plots, fruit per plant counts, seeds per fruit counts |
| $s_1$                                  | Probability that a seed survives from October of year $t$ to January of year $t + 1$ , for seeds produced in year $t$     | Seed bag burial experiment, viability trials                                                                                                                               |
| $s_2$                                  | Probability that a seed survives from January of year $t + 1$ to October of year $t + 1$ , for seeds produced in year $t$ | Seed bag burial experiment, viability trials                                                                                                                               |
| $s_3$                                  | Probability that a seed survives from October of year $t + 1$ to January of year $t + 2$ , for seeds produced in year $t$ | Seed bag burial experiment, viability trials                                                                                                                               |
| <b>GERMINATION</b>                     |                                                                                                                           |                                                                                                                                                                            |
| $g_1$                                  | Probability of germination for a seed that has survived to January of year $t + 1$ , for seeds produced in year $t$       | Seed bag burial experiment, viability trials                                                                                                                               |
| <b>PER-CAPITA REPRODUCTIVE SUCCESS</b> |                                                                                                                           |                                                                                                                                                                            |
| $\sigma$                               | Probability of seedling survival to fruiting, from a January/February census through reproduction in June/July            | Seedling count in permanent plots, fruiting plant count in permanent plots                                                                                                 |
| $F$                                    | Number of fruits per fruiting plant                                                                                       | Fruit counts on plants in permanent plots, fruit counts on plants in additional plots, seeds per fruit counts on plants in additional plots                                |
| $\phi$                                 | Number of seeds per fruit                                                                                                 | Seeds per fruit counts on plants in additional plots                                                                                                                       |

Table 2: Summary of observations and experiments

| Parameter data                         | Description      | Time span |
|----------------------------------------|------------------|-----------|
| SEED VITAL RATES                       | —                | —         |
| Seed survival and germination          | Seed bag burial  | 2005-2008 |
| Seed viability                         | Viability trials | 2005-2008 |
| SEEDLING SURVIVAL                      | —                | —         |
| Seedling survival to fruiting          | Field surveys    | 2006-2020 |
| FRUITS PER PLANT                       | —                | —         |
| Total fruit equivalents per plant      | Field surveys    | 2006-2012 |
| Undamaged and damaged fruits per plant | Field surveys    | 2013-2020 |
| Total fruit equivalents per plant      | Extra plots      | 2006-2012 |
| Undamaged and damaged fruits per plant | Extra plots      | 2013-2020 |
| SEEDS PER FRUIT                        | —                | —         |
| Seeds per undamaged fruit              | Lab counts       | 2006-2020 |
| Seeds per damaged fruit                | Lab counts       | 2013-2020 |

Table 3: Summary of key results for tests of bet hedging.

|                                                                                                     |                                            |
|-----------------------------------------------------------------------------------------------------|--------------------------------------------|
| DEMOGRAPHIC TEST OF BET HEDGING                                                                     | Summary                                    |
| Reproductive success accounting for complete reproductive failure                                   |                                            |
| 1. $\lambda_a(\text{noSB}) > \lambda_a(\text{SB})$                                                  | 20/20 populations                          |
| 2. $\text{Var}(\lambda(\text{noSB})) > \text{Var}(\lambda(\text{SB}))$                              | 20/20 populations                          |
| 3. $\lambda_s(\text{noSB}) < \lambda_s(\text{SB})$                                                  | 7/20 populations                           |
| PREDICTED VS. OBSERVED GERMINATION                                                                  | Summary                                    |
| Germination fractions less than 1                                                                   | 13/20 populations                          |
| LIFE HISTORY COMPONENTS                                                                             | Posterior mode (95% credible interval)     |
| Correlation between germination and seed survival                                                   | $\rho_{g,s_2s_3} = -0.067 (-0.465, 0.408)$ |
| Correlation between germination and geometric standard deviation of per-capita reproductive success | $\rho_{g,GSD} = -0.121 (-0.422, 0.341)$    |

## Figure legends

Figure 1: Map of the populations, and summary of aboveground observations of demography. (A) Elevation map of study populations. (B) Graphical summary of 15 years of aboveground observations at study populations. Open circles indicate that no seedlings survived in permanent plots; Xs indicate that no seedlings or plants were observed in surveys. Populations are arrayed from west (bottom) to east (top).

Figure 2: Graphical summary of the observations, models, and parameters used to estimate per-capita reproductive success, germination, and seed survival. (A) A graphical representation of the relationship between the structure of observations and the data. A directed acyclic graph for the model of seedling survival to fruiting, with colors corresponding to the simulated example in the plots showing the relationship between model parameters, marginalized probabilities, and data. (B) A graphical representation of the field seed bag experiments and lab viability trials. The experiments are related to estimates of seed survival, germination, and viability.

Figure 3: Test of the demographic patterns expected with bet hedging. (A) Plot of the arithmetic population growth rate without a seed bank against arithmetic population growth with a seed bank. (B) Plots of the variance in annual population growth rate without a seed bank against the variance in population growth rate with a seed bank. (C) Plot of the long-term stochastic population growth rate without a seed bank against the long-term stochastic growth rate without a seed bank. In all plots, the dotted line is the 1:1 line.

Figure 4: Comparison of observed and predicted, optimal germination fractions from a density-independent model of bet hedging. For each population, the observed germination fraction,  $g_1$ , is estimate from the model for seed bank vital rates. Each point is the population-specific mode of the posterior of  $g_1$  for a model fit to data from seed bag experiments from 2005-2008 plotted against the predicted, optimal germination fractions. For each population, we found the optimal germination fraction for a density-independent population model. We ran 1000 replicates in which we resampled the annual estimates of per-capita reproductive success. Values for predicted germination fractions are the medians of these replicates, and the error bars are the 95% percentile intervals.

Figure 5: Relationship between germination and seed survival, and between germination and the geometric standard deviation of per-capita reproductive success. (A) The observed germination probability,  $g_1$ , plotted against probability of seed survival,  $s_2s_3$ . (B) Correlation between observed germination probability,  $g_1$ , and the geometric standard deviation of per-capita reproductive success, a measure of the temporal variability in per-capita reproductive success. In both panels, points are the posterior modes; error bars are the 68% highest posterior density intervals (under a normal distribution, 68% of the distribution is within  $\pm 1$  standard deviation).
